# Supplementary material
Source: Springer Nature journal article supplement (https://www.springerprofessional.de/resource/supplementary/13638_2014_1052_MOESM21_ESM.pdf/11898858)
Supplement: MOESM21 [file 11898858]

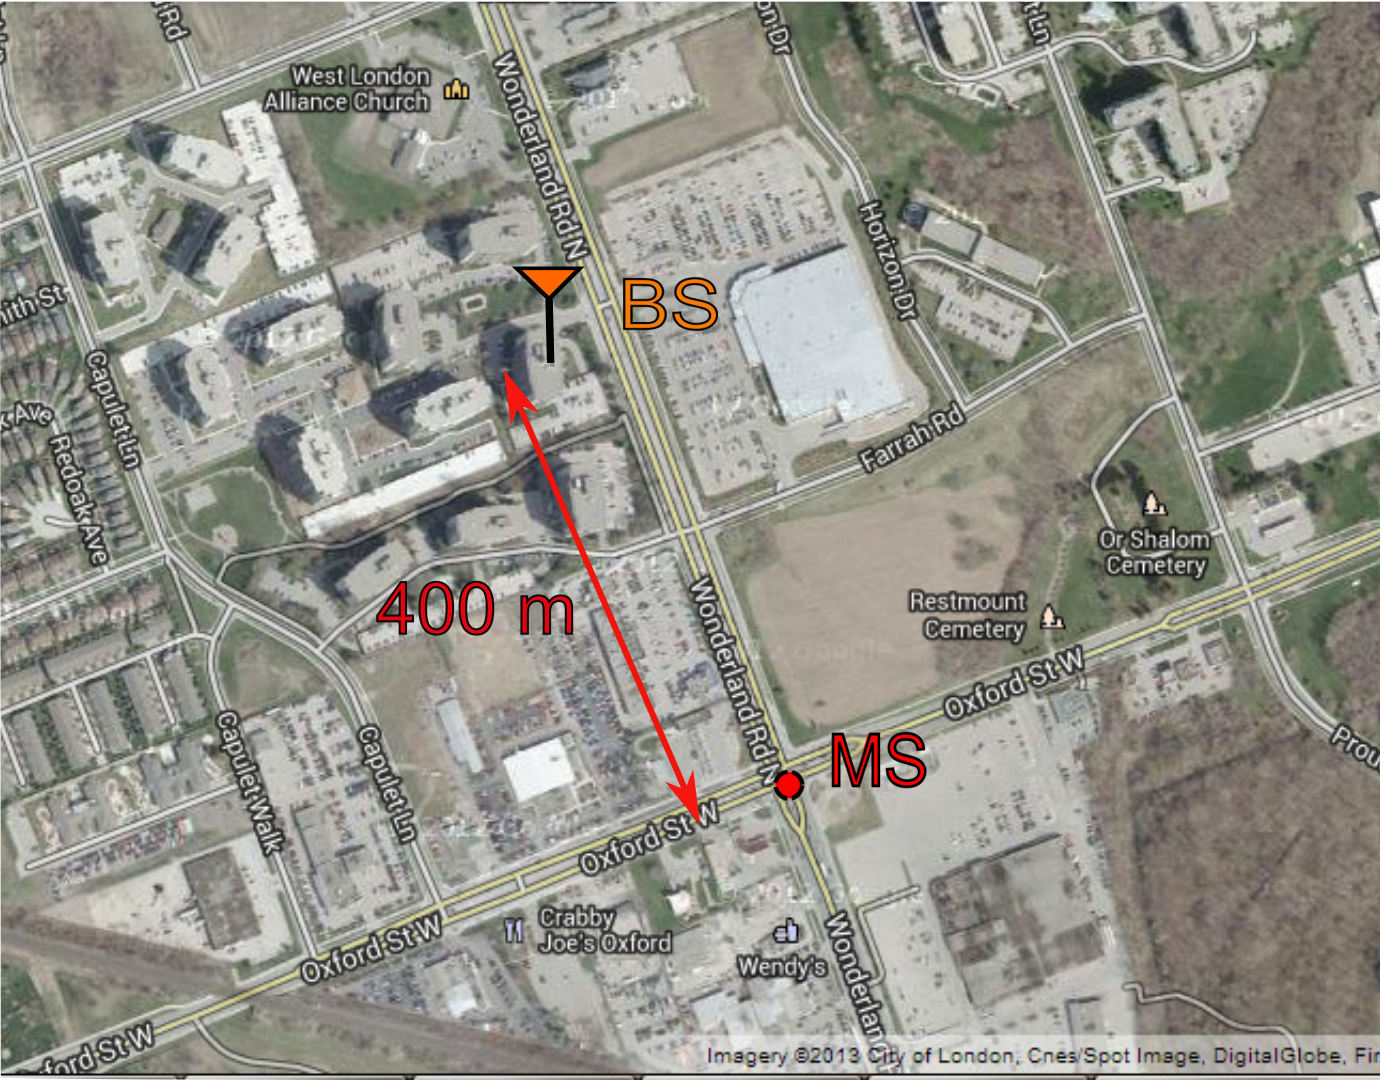

West London Alliance Church

Wonderland Rd N

BS

Horizon Dr

Farrah Rd

Or Shalom Cemetery

Restmount Cemetery

Oxford St W

MS

Oxford St W

Crabby Joe's Oxford

Wendy's

400 m
